# Supplementary material for: Comparing prevalence of chronic kidney disease and its risk factors between population-based surveys in Russia and Norway
Source: Springer Nature journal article supplement (doi:10.1186/s12882-022-02738-2), 2022-04-14
Supplement: MOESM2 [file 20312990]

**Supplementary Figure 2a: Prevalence of chronic kidney disease, reduced eGFR (<60 ml/min/1.73m<sup>2</sup>) and albuminuria in men by age and study (complete case analysis)**

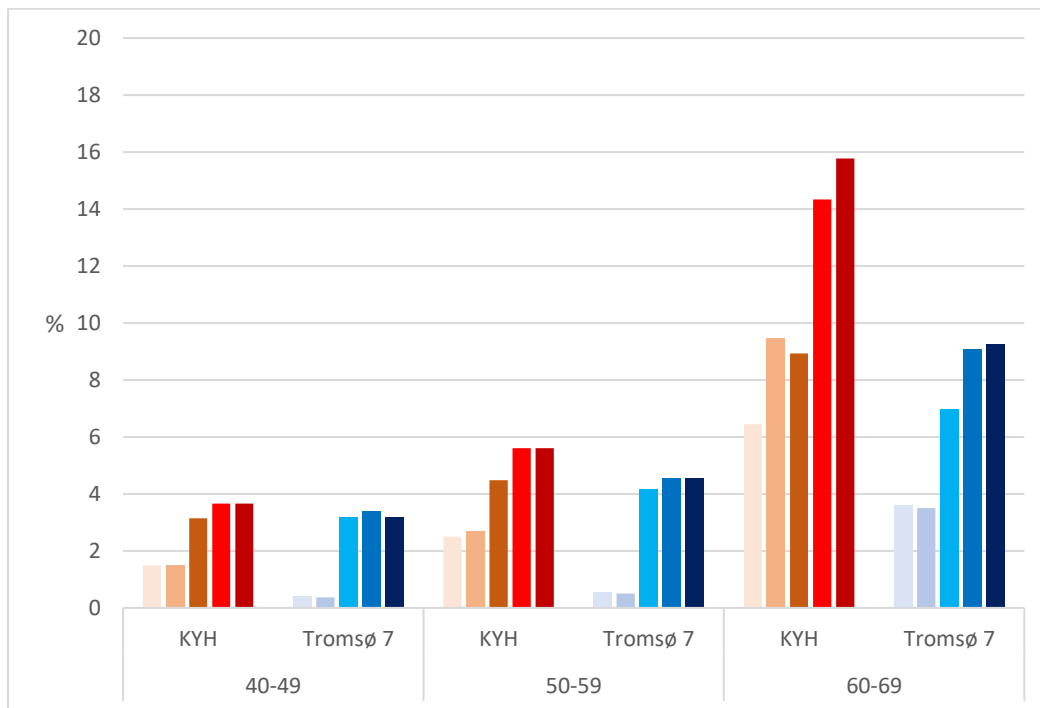

**Supplementary Supplementary Figure 2b: Prevalence of chronic kidney disease, reduced eGFR (<60 ml/min/1.73m<sup>2</sup>) and albuminuria in women by age and study (complete case analysis)**

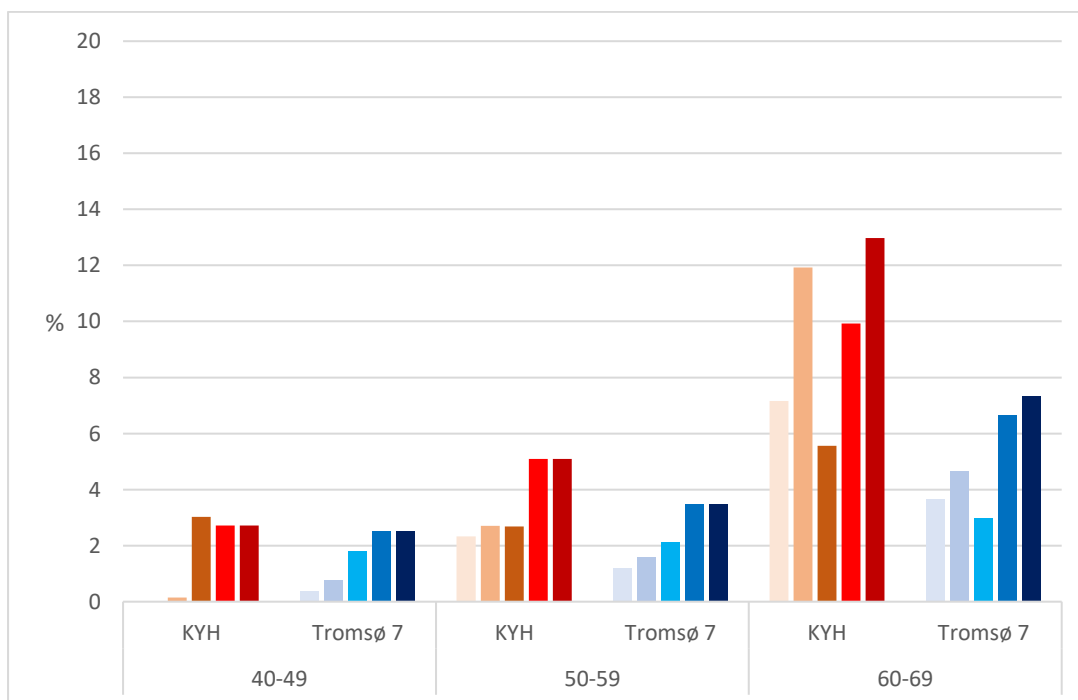

## Supplementary Figure 2 Key

| KYH                                                                                                                                                        | Tromsø 7                                                                                                                                                   |
|------------------------------------------------------------------------------------------------------------------------------------------------------------|------------------------------------------------------------------------------------------------------------------------------------------------------------|
|  eGFR<60 (CKD EPI creatinine equation)                                    |  eGFR<60 (CKD EPI creatinine equation)                                    |
|  eGFR<60 (CKD EPI cystatin C- Creatinine equation)                        |  eGFR<60 (CKD EPI cystatin C- Creatinine equation)                        |
|  Albuminuria                                                              |  Albuminuria                                                              |
|  CKD (eGFR<60 CKD EPI creatinine equation and /or albuminuria)            |  CKD (eGFR<60 CKD EPI creatinine equation and /or albuminuria)            |
|  CKD (eGFR<60 CKD EPI cystatin c- creatinine equation and/or albuminuria) |  CKD (eGFR<60 CKD EPI cystatin c- creatinine equation and/or albuminuria) |
