# Supplementary material for: Comparing prevalence of chronic kidney disease and its risk factors between population-based surveys in Russia and Norway
Source: Springer Nature journal article supplement (doi:10.1186/s12882-022-02738-2), 2022-04-14

Supplementary Figure 4. Distribution of urinary albumin to creatinine ratio by Study

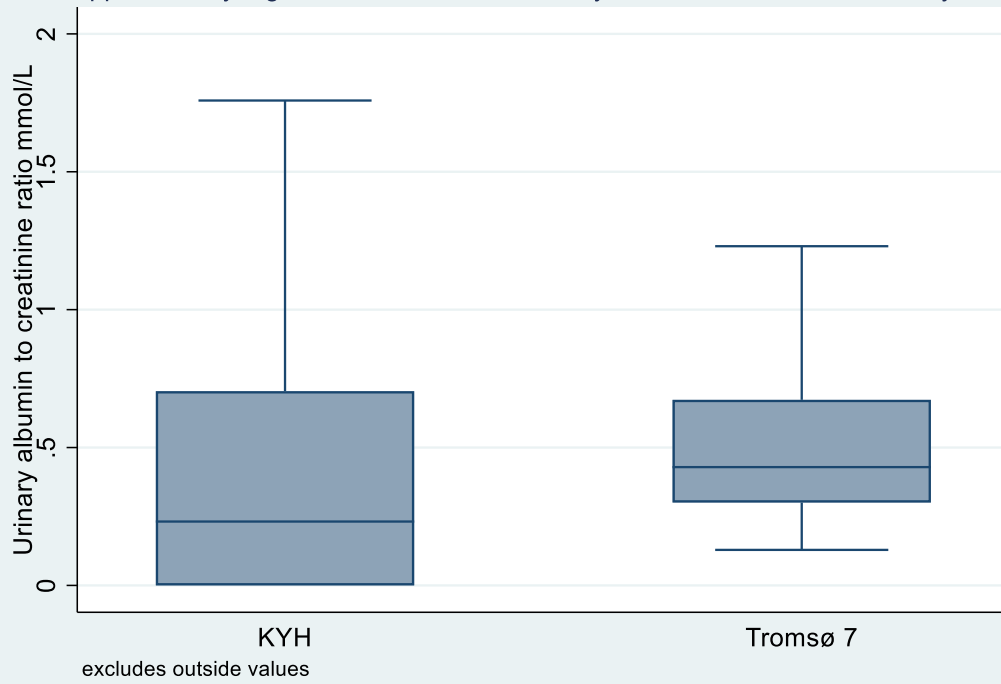

Supplement: MOESM5 [file 20312990]
